1  
2  
3  
4  
5  
6  
7  
8  
9  
10  
11  
12  
13  
14  
15  
16  
17  
18  
19  
20  
21  
22  
23

**LY6E Restricts the Entry of Human Coronaviruses, including the currently pandemic  
SARS-CoV-2**

Xuesen Zhao<sup>1, 2, 4#\*</sup>, Shuangli Zheng<sup>1, 2#</sup>, Danying Chen<sup>1, 2</sup>, Mei Zheng<sup>1, 2</sup>, Xinglin Li<sup>1, 2</sup> Guoli  
Li<sup>1, 2</sup>, Hanxin Lin<sup>3</sup>, Jinhong Chang<sup>4</sup>, Hui Zeng<sup>1, 2</sup> and Ju-Tao Guo<sup>4\*</sup>

<sup>1</sup>Institute of Infectious disease, Beijing Ditan Hospital, Capital Medical University, Beijing 100015, China. <sup>2</sup>Beijing Key Laboratory of Emerging Infectious Disease, Beijing 100015, China. <sup>3</sup>Department of Pathology and Laboratory Medicine, Western University, 1151 Richmond Street, London, Ontario, Canada. <sup>4</sup>Baruch S. Blumberg Institute, Hepatitis B Foundation, 3805 Old Easton Road, Doylestown, PA 18902. USA.

Running Title: LY6E restricts human coronavirus entry

\* Corresponding author's mailing address:

Xuesen Zhao, Beijing Ditan Hospital, Capital Medical University, Beijing, China. E-mail: [zhaoxuesen@ccmu.edu.cn](mailto:zhaoxuesen@ccmu.edu.cn)

Ju-Tao Guo, Baruch S. Blumberg Institute, Doylestown, PA 18902. USA. E-mail: [ju-tao.guo@bblumberg.org](mailto:ju-tao.guo@bblumberg.org)

#These authors are co-first authors.

24

25 **ABSTRACT**

26 C3A is a sub-clone of human hepatoblastoma HepG2 cell line with the strong contact inhibition  
27 of growth. We fortuitously found that C3A was more susceptible to human coronavirus HCoV-  
28 OC43 infection than HepG2, which was attributed to the increased efficiency of virus entry into  
29 C3A cells. In an effort to search for the host cellular protein(s) mediating the differential  
30 susceptibility of the two cell lines to HCoV-OC43 infection, we found that ADAP2, GILT and  
31 LY6E, three cellular proteins with known activity of interfering virus entry, expressed at  
32 significantly higher levels in HepG2 cells. Functional analyses revealed that ectopic expression  
33 of LY6E, but not GILT or ADAP2, in HEK 293 cells inhibited the entry of HCoV-OC43. While  
34 overexpression of LY6E in C3A and A549 cells efficiently inhibited the infection of HCoV-  
35 OC43, knockdown of LY6E expression in HepG2 significantly increased its susceptibility to  
36 HCoV-OC43 infection. Moreover, we found that LY6E also efficiently restricted the entry  
37 mediated by the envelope spike proteins of other human coronaviruses, including the currently  
38 pandemic SARS-CoV-2. Interestingly, overexpression of serine protease TMPRSS2 or  
39 amphotericin treatment significantly neutralized the IFITM3 restriction of human coronavirus  
40 entry, but did not compromise the effect of LY6E on the entry of human coronaviruses. The  
41 work reported herein thus demonstrates that LY6E is a critical antiviral immune effector that  
42 controls CoV infection and pathogenesis *via* a distinct mechanism.

43 **Importance**

44

45 Virus entry into host cells is one of the key determinants of host range and cell tropism and is  
46 subjected to the control by host innate and adaptive immune responses. In the last decade,  
47 several interferon inducible cellular proteins, including IFITMs, GILT, ADAP2, 25CH and  
48 LY6E, had been identified to modulate the infectious entry of a variety of viruses. Particularly,  
49 LY6E was recently identified as host factors to facilitate the entry of several human pathogenic  
50 viruses, including human immunodeficiency virus, influenza A virus and yellow fever virus.  
51 Identification of LY6E as a potent restriction factor of coronaviruses expands the biological  
52 function of LY6E and sheds new light on the immunopathogenesis of human coronavirus  
53 infection.

54

## 55 INTRODUCTION

56

57        Coronaviruses (CoV) are a large family of enveloped positive-strand RNA viruses with  
58 broad host ranges and tissue tropism (1, 2). While four human CoVs, including HCoV-229E,  
59 HCoV-OC43, HCoV-NL63 and HCoV-HKU1, cause mild upper respiratory tract infections,  
60 three zoonotic CoVs have crossed species barriers to infect humans since 2002 and cause severe  
61 acute respiratory syndrome (SARS) (3, 4), Middle East respiratory syndrome (MERS) (5, 6) and  
62 coronaviral disease-19 (COVID-19) (7, 8), with the mortality rate of 10%, 30% and 1 to 2%,  
63 respectively (9, 10). No vaccine or antiviral drug is currently available to prevent CoV infection  
64 or treat the infected individuals. The cross-species transmission of zoonotic CoVs presents a  
65 continuous threat to global human health (11, 12). Therefore, understanding the mechanism of  
66 CoV infection and pathogenesis is important for the development of vaccines and antiviral  
67 agents to control the current COVID-19 pandemics and prevent future zoonotic CoV threats.

68        CoV entry into host cells, a process to deliver viral nucleocapsids cross the plasma  
69 membrane barrier into the cytoplasm, is the key determinant of virus host range and plays a  
70 critical role in zoonotic CoV cross-species transmission (2, 13). The entry process begins by the  
71 binding of viruses to their specific receptor on the plasma membrane, which triggers endocytosis  
72 to internalize the viruses into the endocytic vesicles. The cleavage of viral envelope spike  
73 proteins by endocytic proteases and/or endosomal acidification triggers the conformation change  
74 of spike protein to induce the fusion of viral envelope with endocytic membrane and release  
75 nucleocapsids into the cytoplasm to initiate viral protein synthesis and RNA replication. While  
76 angiotensin-converting enzyme 2 (ACE2) is the *bona fide* receptor for SARS-CoV, SARS-CoV-  
77 2 and HCoV-NL63 (14-16), MERS-CoV and HCoV-229E use dipeptidyl peptidase-4 (DPP4)

78 and CD13 (also known as aminopeptidase N) as their receptor, respectively (17, 18). However,  
79 HCoV-OC43 and HCoV-HKU1 bind to 9-O-acetylated sialic acids *via* a conserved receptor-  
80 binding site in spike protein domain A to initiate the infection of target cells (19). As the key  
81 determinant of cell tropism, host range, and pathogenesis, CoV entry is primarily controlled by  
82 interactions between the spike envelope glycoprotein and host cell receptor as well as the  
83 susceptibility of spike glycoprotein to protease cleavage and/or acid-induced activation of  
84 membrane fusion (20, 21). For instance, SARS-CoV can use ACE2 orthologs of different animal  
85 species as receptors (22-26) and the efficiency of these ACE2 orthologs to mediate SARS-CoV  
86 cell entry is consistent with the susceptibility of these animals to SARS-CoV infection (27-30).  
87 In addition, expression of endosomal cathepsins, cell surface transmembrane proteases  
88 (TMPRSS), furin, and trypsin differentially modulates the entry of different human CoVs (31-  
89 35).

90 Interferons (IFNs) are the primary antiviral cytokines that mediate innate and adaptive  
91 immune control of virus infection by inducing hundreds of genes, many of which encode  
92 antiviral effectors (36). In the last decades, several IFN-inducible proteins, including three IFN-  
93 induced transmembrane (IFITM) proteins (37), gamma-interferon-inducible  
94 lysosome/endosome-localized thiolreductase (GILT) (38), 25-Hydroxycholesterol hydrolase  
95 (25HC) (39), ArfGAP with dual pleckstrin homology (PH) domains 2 (ADAP2) (40) and  
96 lymphocyte antigen 6 family member E (LY6E) (41) had been identified to restrict or enhance  
97 the entry of a variety of viruses. Interestingly, while IFITM proteins inhibit the entry of all the  
98 other human CoVs, HCoV-OC43 hijacks human IFITM2 or IFITM3 as entry factors to facilitate  
99 its infection of host cells (42, 43). We also demonstrated recently that GILT suppresses the entry  
100 of SARS-CoV, but not other human CoVs (38). As reported herein, in our efforts to identify host

101 factor(s) determining the differential susceptibility of two closed related human hepatoma cell  
102 lines to HCoV-OC43 infection, we found that LY6E potently suppresses the infectious entry of  
103 all the human CoVs, including the currently pandemic SARS-COV-2. Our study also revealed  
104 that unlikely IFITMs, LY6E inhibits CoV entry *via* a distinct mechanism.

105

106

## RESULTS

107

108 **C3A is more susceptible to HCoV-OC43 infection than its parental cell line HepG2.** C3A is  
109 a sub-clone of HepG2 that was selected for strong contact inhibition of growth and high albumin  
110 production (44). Metabolically, C3A is more relevant to normal hepatocytes and has been used  
111 for development of bioartificial liver devices (45). Interestingly, we found that these two closely  
112 related cell lines drastically differ in their susceptibility to HCoV-OC43 infection (Fig. 1).  
113 Specifically, infection of the two cell lines with the virus at a MOI of 0.02, 0.2 and 1 resulted in  
114 approximately 75, 25 and 10 folds more infected cells in C3A cultures than in HepG2 cultures at  
115 24 h post infection, respectively (Fig. 1A). Consistent with this finding, much higher levels of  
116 viral nucleocapsid protein (N) and RNA were detected in infected C3A cultures (Figs. 1B and C).  
117 Infected C3A cultures also produced approximately 20-fold more progeny viruses than HepG2  
118 cultures did (Fig. 1D). To determine whether the differential susceptibility of the two hepatoma  
119 cell lines to HCoV-OC43 infection is due to a difference in virus entry or post-entry replication  
120 event, we compared the susceptibility of the two cell lines to lentiviral particles pseudotyped  
121 with envelope proteins of HCoV-OC43, influenza A virus (IAV), vesicular stomatitis virus (VSV)  
122 or Lassa fever virus (LASV). As shown in Fig 2, while pseudoviral particles of IAV (IAVpp),  
123 VSV (VSVpp) and LASV (LASVpp) infected the two cell lines with similar efficiency, the

124 efficiency of HCoV-OC43pp infection in C3A cultures is approximately 50 folds higher than  
125 that in HepG2 cultures. These results clearly indicate that the differential susceptibility is  
126 attributed to the distinct ability of the two cell lines to support the infectious entry of HCoV-  
127 OC43.

128

129 **IFITM proteins modulate HCoV-OC43 infection of C3A and HepG2 cells in a similar**  
130 **extent.** We reported previously that IFITM proteins differentially modulate HCoV-OC43 entry  
131 into target cells. While IFITM1 inhibits the virus entry, IFITM2 and IFITM3 enhance the cellular  
132 entry of this virus (42). To investigate whether the differential expression of IFITM proteins in  
133 the two cell lines is responsible for their difference in HCoV-OC43 infection efficiency, we  
134 examined IFITM protein expression by Western blot assays and found the two hepatoma cell  
135 lines expressed similar levels of IFITM1 and IFITM2/3 (Fig. 1B). Because the C-terminal  
136 variable regions of IFITM1 and IFITM3 control the inhibition and enhancement of HCoV-OC43  
137 entry (42), respectively, we further compared the effects of IFITM1 and C-terminal region  
138 exchanged IFITM proteins on the virus infection. As shown in Fig. 3, in spite of their distinct  
139 susceptibility, expression of IFITM1-EX2, a mutant IFITM1 protein with its C-terminal domain  
140 replaced with the C-terminal domain of IFITM3 (42), and IFITM3-EX2, a mutant IFITM3  
141 protein with its C-terminal domain replaced with the C-terminal domain of IFITM1 (42),  
142 significantly enhanced and inhibited HCoV-OC43 infection of both cell lines, respectively, as  
143 evidenced by the significant changes in infected cell percentage (Fig. 3A), reduced viral  
144 nucleocapsid protein expression (Fig. 3B), intracellular RNA accumulation (Fig. 3C) and yields  
145 of progeny virus production (Fig. 3D). Moreover, pseudotyped lentiviral infection assay further  
146 demonstrated that IFITM1, IFITM1-EX2 and IFITM3-EX2 modulated HCoV-OC43 envelope

147 proteins mediated entry in a similar extent in the two cell lines (Fig. 3E). Accordingly, we  
148 concluded that IFITM proteins were not responsible for the observed differential susceptibility of  
149 the two hepatoma cell lines to HCoV-OC43 infection.

150

151 **LY6E inhibits the entry mediated by human CoV envelope spike proteins and is**  
152 **responsible for the differential susceptibility of C3A and HepG2 cells to HCoV-OC43**  
153 **infection.** In order to identify host cellular proteins that may enhance HCoV-OC43 infection of  
154 C3A cells or suppress the virus entry into HepG2 cells, we first compared the expression of  
155 several cellular genes with known activity to restrict or enhance virus entry into target cells. As  
156 shown in Fig. 4A, we found that ADAP2, GILT and LY6E mRNA expressed at significantly  
157 higher levels in HepG2 cells. While the expression of ADAP2 and GILT did not inhibit HCoV-  
158 OC43pp infection (Fig. 4B), expression of LY6E in Flp-In TREx 293 cells efficiently suppressed  
159 the infection of lentiviral particles pseudotyped with the envelope glycoproteins of all the human  
160 CoVs including SARS-CoV-2, except for SARS-CoV (Fig. 4C and 4D). In addition, LY6E  
161 enhanced the infection of IAVpp (Fig. 4D). In agreement with our previous report, expression of  
162 GILT inhibited SARS-CoVpp infection (38). To further confirm the role of LY6E in HCoV-  
163 OC43 infection, we showed that ectopic expression of LY6E in C3A and A549 cells  
164 significantly reduced their susceptibility to the virus infection, whereas reducing the expression  
165 of LY6E in HepG2 cells by shRNA knockdown significantly increased HCoV-OC43 infection  
166 (Fig. 5). The results presented above imply that LY6E is a restriction factor for human CoVs and  
167 responsible for the differential susceptibility of C3A and HepG2 cells to HCoV-OC43 infection.

168



169 **LY6E restriction of human coronavirus entry depends on GPI-anchor and the**  
170 **evolutionally conserved L36 residue.** LY6E is a member of the LY6/uPAR superfamily. Like  
171 most LY6 family members, LY6E contains ten cysteines that form a highly conserved, three-  
172 finger folding motif through disulfide bonding and localizes on the plasma membrane of cells *via*  
173 glycosylphosphatidylinositol (GPI) anchoring. LY6E is ubiquitously expressed in many cell  
174 types and functions in modulation of cell signal transduction (41). Recent studies revealed that  
175 human LY6E promotes the entry of HIV (46, 47) and multiple enveloped RNA viruses from  
176 several viral families (48). Moreover, the enhancement of RNA viral infection is a conserved  
177 function of all the mammalian LY6E orthologs examined thus far. Particularly, substitution of  
178 the evolutionally conserved residue L36 with alanine (A) completely abolished the viral  
179 enhancement activity of LY6E (48). Interestingly, we found that L36A substitution also  
180 abolished the activity of LY6E to restrict the entry of human CoVs (Fig. 6). As anticipated,  
181 N99A substitution that disrupts the addition of GPI anchor also abrogated the inhibitory effects  
182 of LY6E on human CoV entry (Fig. 6). These results indicate that proper interaction of LY6E  
183 with other viral/cellular components *via* the conserved residue L36 and localization in the  
184 specific cell membrane microdomains are required for LY6E restriction of human CoV entry.

185

186 **Activation of CoV entry by TMPRSS2 expression fails to evade LY6E restriction of CoV**  
187 **entry.** It was reported by others and us that expression of cell membrane associated serine  
188 protease TMPRSS2 enhances SARS-CoV and SARS-like bat CoV entry (32-34). More  
189 importantly, the TMPRSS2-enhanced entry can evade IFITM3 restriction (*Mei Zheng, et al,*  
190 *manuscript under review*), presumably because the cellular protease activates the viral fusion at  
191 cell surface or early endosomes where IFITM3 expression at a relatively lower levels and thus

192 fails to inhibit viral fusion. To determine the effects of TMPRSS2 expression on LY6E  
193 restriction of human CoV entry, Flp-In TREx 293-derived cell line expressing LY6E were  
194 transfected with a control vector (pCAGGS) or a plasmid expressing human TMPRSS2 and  
195 cultured in the absence or presence of tetracycline (tet) for 24 h. The cells were then infected  
196 with the indicated pseudotyped lentiviruses. As shown in Fig. 7A, in absence of tet to induce  
197 LY6E, expression of TMPRSS2 significantly enhanced the infection of SARS-CoVpp, MERS-  
198 CoVpp and HCoV-229Epp, but not the infection of other human CoVpp and LASVpp.  
199 Interestingly, LY6E significantly inhibited the infection of MERS-CoVpp and HCoV-229Epp in  
200 the cells without or with ectopic expression of TMPRSS2. Moreover, LY6E failed to inhibit  
201 SARS-CoVpp infection in the absence of TMPRSS2 expression, but significantly inhibited  
202 SARS-CoVpp infection in the cells expressing TMPRSS2 (Fig. 7B). Therefore, unlikely IFITM3,  
203 expression of TMPRSS2 cannot evade LY6E restriction of human CoV entry. Instead, LY6E  
204 restriction of the entry of human CoVs, particularly SARS-CoV, is regulated by the expression  
205 of cellular proteases that previously known to activate the fusion activity of viral spike proteins.

206

#### 207 **Amphotericin B treatment does not compromise LY6E restriction of human CoV entry.**

208 Amphotericin B (AmphoB) is antifungal medicine that binds with ergosterol in fungal cell  
209 membranes, forming pores that cause rapid leakage of monovalent ions and subsequent fungal  
210 cell death. AmphoB can also bind to cholesterol in mammalian cell membrane, albeit at a lesser  
211 affinity than to fungal ergosterol (49). The cholesterol-enriched plasma membrane microdomains  
212 known as lipid rafts play important roles in the entry and egress of many enveloped viruses (50,  
213 51). Particularly, AmphoB treatment had been shown to significantly compromise IFITM  
214 restriction of IAV entry (52) and attenuate IFITM enhancement of HCoV-OC43 infection (42).

215 In this study, we further demonstrated that AmphoB treatment also efficiently attenuated the  
216 restriction of IFITM3 on the infection of SARS-CoVpp, MERS-CoVpp, HCoV-NL63pp, HCoV-  
217 229Epp and IAVpp, but not LASVpp (Fig. 8A). However, AmphoB treatment altered neither the  
218 restriction activity of LY6E on the infection of human CoV spike protein-pseudotyped  
219 lentiviruses nor the enhancement of LY6E on IAVpp infection (Fig. 8B). These results strongly  
220 imply that LY6E modulates virus entry *via* a distinct mechanism.

221

222

## DISCUSSION

223

224 LY6E was initially identified as a cell surface marker to discriminate immature from  
225 mature thymocytes subsets (53). The primary function of LY6E has been associated with  
226 immune regulation, specifically in modulating T cell activation, proliferation, development (54).  
227 In addition to lymphocytes, LY6E mRNA can also be detected in liver, spleen, uterus, ovary,  
228 lung, and brain and its expression can be induced by type I IFN in a cell-type specific manner  
229 (53). However, LY6E is not a typical antiviral effector protein. Instead, LY6E was reported to  
230 promote the infection of enveloped RNA viruses from several viral families (48) and modulates  
231 HIV-1 infection in a manner dependent on the level of CD4 expression in target cells (46, 47).  
232 Our finding that LY6E restricts human CoV infection and characterization of its antiviral effects  
233 shed new lights on the mode of LY6E action on virus entry in general.

234 First, either the enhancement or restriction of LY6E on virus entry depends on its GPI  
235 anchor (Fig. 6) (46-48). GPI-anchored proteins are preferentially located in lipid rafts, the plasma  
236 membrane microdomains enriched in glycosphingolipids and cholesterol as well as protein  
237 receptors or ligands. Lipid rafts are considered to compartmentalize membrane processes by

238 facilitating the interaction of protein receptors and their ligands/effectors to modulate membrane  
239 functions, such as signal transduction, membrane fusion, vesicle budding and trafficking. Lipid  
240 rafts also involve in the entry and egress of many viruses. For instance, both HIV-1 receptor  
241 (CD4) and coreceptors are localized in lipid rafts. Yu and colleagues elegantly demonstrated  
242 recently that LY6E enhances HIV-1 infection of CD4+ T cells and monocytic THP1- cells by  
243 promoting the expansion of viral fusion pore induced by HIV-1 Env (47). Furthermore, LY6E  
244 was found to be the receptor of mouse endogenous retroviral envelope Syncytin-A and  
245 interaction of LY6E with Syncytin-A induces the syncytiotrophoblast fusion and placental  
246 morphogenesis (55, 56). However, Mar and colleagues showed that LY6E enhances IAV  
247 infection of cells by promoting a viral replication step after viral nucleocapsid escape from  
248 endosomes, but before viral RNP nuclear translocation, *i.e.*, most likely the uncoating of  
249 nucleocapsids (48). Interestingly, the results presented in Fig. 4 indicate that LY6E significantly  
250 enhanced the infection of IAVpp, suggesting that the LY6E enhancement of IAV infection is, at  
251 least in part, through promoting the entry into target cells, possibly also by enhancing viral  
252 fusion. Considering the broad inhibitory effects of LY6E on human CoVs and its fusogenic or  
253 fusion-modulating activity, we speculate that LY6E might inhibit the membrane fusion triggered  
254 by CoV spike proteins. However, the role of LY6E on endocytosis and endocytic vesicle  
255 trafficking cannot be ruled out. These hypotheses are currently under investigation.

256         Second, in addition to GPI anchor, the evolutionally conserved amino acid residue L36 is  
257 also required for both the enhancement and restriction of virus entry into target cells by LY6E  
258 (Fig. 6) (48). It can be speculated that this specific residue may mediate an interaction with other  
259 cellular membrane proteins to module viral entry. The fact that LY6E enhances viral infectivity  
260 in a cell type-specific manner, with the strongest phenotype in cells of fibroblast and monocytic

261 lineages (48), does indicate the involvement of other host cellular factors. Variations in the  
262 abundance of expression, as well as the localization of LY6E and its associated proteins or lipids,  
263 may explain the differential effects of LY6E on the infection of different viruses in different cell  
264 types (Fig. 4 and 7). However, LY6E enhancement of RNA virus infection appears to be  
265 independent of type I interferon response and other ISG expression (48). Particularly,  
266 enhancement of viral infection in Huh7.5 cells that do not have basal levels of IFITM protein  
267 expression indicates that LY6E enhancement of RNA viral infection is most likely not through  
268 modulating the function of IFITM proteins (42). This notion is further supported by the finding  
269 that LY6E and Syncytin-A mediated syncytiotrophoblast fusion can be inhibited by IFITM  
270 proteins (57, 58).

271 Third, studying the effects of LY6E on HIV-1 infection of CD4 low-expressing cells,  
272 such as Jurkat T cells and primary monocyte-derived macrophages, revealed that HIV-1 entry  
273 was inhibited by LY6E (46). This appears due to the LY6E-induced reduction of lipid raft-  
274 associated CD4 on the surface of these cells. It was demonstrated that LY6E can promote CD4  
275 endocytosis and mobilize lipid raft-associated CD4 molecules to non-raft microdomains. Such a  
276 receptor down-regulation significantly reduced HIV-1 binding and infection of CD4 low-  
277 expressing cells (macrophages), but did not significantly impact the binding of HIV-1 to CD4  
278 high-expressing cells, which allows for LY6E to predominantly enhance HIV-1 infection of  
279 CD4+ T lymphocytes by promotion of membrane fusion (46). It is, therefore, possible that LY6E  
280 inhibition of human CoV infection is due to the down-regulation of lipid raft-associated CoV  
281 receptors. However, the differential effects of LY6E on the infection of SARS-CoVpp, SARS-  
282 CoV-2pp and HCoV-NL63pp, that share the ACE2 receptor, does not support such a hypothesis  
283 (Fig. 4).

284 Finally, the findings that LY6E inhibits human CoV entry cannot be evaded by ectopic  
285 expression of membrane-associated serine protease TMPRSS2 and compromised by AmphoB  
286 treatment strongly indicate that LY6E modulates virus entry *via* a distinct mechanism from that  
287 IFITM proteins do (Figs. 7 and 8). Specifically, inhibition of TMPRSS2-enhanced CoV entry  
288 implies that LY6E most likely blocks virus entry at plasma membrane or in early endosomes.  
289 Moreover, IFITMs impede viral fusion by decreasing membrane fluidity and curvature (37).  
290 AmphoB can bind cholesterol in cell membranes to increase membrane fluidity and planarity and  
291 consequentially rescue IFITM inhibition of virus entry (52). Interestingly, AmphoB only  
292 neutralize the antiviral effects of IFITM2 and IFITM3, but has little effect on IFITM1 restriction  
293 of virus entry (52). While IFITM1 is predominantly located in the plasma membrane or early  
294 endosomes, IFITM2 and 3 are mainly localized in the later endosomes and lysosomes. Due to  
295 their differential subcellular localization, IFITM1 mainly restricts the viruses that enter the cells  
296 at cell surface or in the early endosomes, such as parainfluenza viruses and hepatitis C virus (59,  
297 60), IFITM2 and 3 primarily restrict the infection of viruses that enter the cells at later  
298 endosomes and/or lysosomes (43, 61, 62). Because AmphoB is endocytosed quite rapidly  
299 leading to its concentration in the late endosomes and lysosomes, it more efficiently alleviates  
300 the effect of IFITM2 and 3, but not IFITM1, on virus entry (52). Similarly, the failure of  
301 AmphoB to attenuate the antiviral effects of LY6E against human CoVs is most likely due to its  
302 predominant cell surface localization and inhibition of an early step of CoV entry.

303 In summary, while it is very interesting to know that LY6E is capable of modulating the  
304 entry of many RNA viruses, we only begin to uncover the mechanism of this fascinating host  
305 factor and define its pathobiological role in virus infection (41, 63). Further understanding the

306 role and mechanism of LY6E in viral infections will establish a scientific basis for development  
307 of therapeutics to harness its function for the treatment of viral diseases.

308

309

## MATERIALS AND METHODS

310

311 **Cell culture.** Human hepatoma cell lines HepG2 and C3A, a sub-clone of HepG2 (ATCC HB-  
312 8065) were purchased from ATCC and cultured in DMEM/F12 medium supplemented with 10%  
313 heat-inactivated fetal bovine serum (FBS) (Invitrogen). Lung cancer cell line A549 were  
314 obtained from ATCC and maintained in DMEM supplemented with 10% FBS. GP2-293 and  
315 Lenti-X 293T cell Lines were purchased from Clontech and cultured in DMEM supplemented  
316 with 10% FBS and 1 mM Sodium pyruvate (Invitrogen). Flp-In TREx 293 cells were purchased  
317 from Invitrogen and maintained in DMEM supplemented with 10% FBS, 10 µg/ml blasticidin  
318 (Invitrogen) and 100 µg/ml Zeocin (Invivogen) (64). Flp-In TREx 293-derived cell lines  
319 expressing LY6E, GILT, ADAP2, or IFITM3 were cultured in DMEM supplemented with 10%  
320 FBS, 5 µg/ml blasticidin and 250 µg/ml hygromycin.

321

322 **Viruses.** HCoV-OC43 (strain VR1558) were purchased from ATCC and amplified in HCT-8  
323 cells according to the instruction from ATCC. Virus titers were determined by a plaque assay as  
324 described previously (42).

325

326 **Antibodies.** Monoclonal antibody against FLAG tag (ANTI-FLAG M2) and β-Actin were  
327 purchased from Sigma (Cat.No. F1804 and A2228, respectively). Monoclonal antibody against  
328 human IFITM1 (Cat.No. 60047-1), rabbit polyclonal antibody against human IFITM3 (Cat.No.

329 11714-1-AP), which also efficiently recognizes IFITM2 and weakly cross-reacts with IFITM1,  
330 were purchased from Proteintech Group, Inc. Mouse monoclonal antibody against HCoV-OC43  
331 nucleocapsid (NP) protein was purchased from Millipore (Cat.No. MAB9012). Rabbit  
332 polyclonal antibody against human LY6E was obtained from proteintech (Cat.No. 22144-1-AP).

333

334 **Plasmid construction.** The cDNA molecules of ADAP2 and LY6E were purchased from  
335 OriGene (Cat. No. RC207501 and RC211373, respectively) and cloned into pcDNA5/FRT-  
336 derived vector as described previously (42). Ly6E and N-terminally FLAG-tagged human  
337 IFITM1, IFITM3 and their mutants were cloned into pQCXIP vector (Clontech) between the  
338 NotI and BamHI sites as previously described (42, 43). pcDNA5/FRT-derived plasmids  
339 expressing chloramphenicol acetyltransferase (CAT), N-terminally FLAG-tagged human  
340 IFITM3 were reported previously (64-66).

341 Plasmids expressing HCoV-OC43 spike (S) and HE proteins, VSV G protein, H1N1 IAV  
342 (A/WSN/33) hemagglutinin (HA) and neuraminidase (NA), LASV GP protein, murine leukemia  
343 virus (MLV) envelope protein, HCoV-NL63, HCoV-229E, SARS-CoV and MERS-CoV spike  
344 protein were described previously (67, 68). The codon-optimized (for human cells) SARS-CoV-  
345 2 spike gene, which is based on NCBI Reference Sequence YP\_009724390.1, was purchased  
346 from GeneScript and cloned into pCAGGS vector as described previously (69). pRS-derived  
347 retroviral vectors expressing a scramble shRNA and shRNA targeting the mRNA of human  
348 LY6E were obtained from OriGene (Cat. No. TR311641).

349 Plasmid pNL4-3.Luc.R<sup>+</sup>E<sup>-</sup> was obtained through the NIH AIDS Research and Reference  
350 Reagent Program (70, 71). Angiotensin I converting enzyme 2 (ACE2), aminopeptidase N  
351 (APN), and dipeptidyl peptidase-4 (DPP4) cDNA clones were obtained from Origene, and



352 cloned into a pcDNA3 vector (Invitrogen) to yield plasmid pcDNA3 /ACE2, pcDNA3 /APN and  
353 pcDNA3/DDP4, respectively (69).

354

355 **Package of pseudotyped retroviral particles.** The various viral envelope protein pseudotyped  
356 lentiviruses bearing luciferase reporter gene as well as VSV G protein pseudotyped Moloney  
357 murine leukemia virus (MMLV)-derived retroviral vectors (pQCXIP) expressing wild-type and  
358 mutant human IFITM, LY6E, or pRS vector-derived plasmid expressing a scrambled shRNA or  
359 shRNA specifically targeting human LY6E were packaged as reported previously . Each  
360 pseudotype was titrated by infection of cells with a serial dilution of pseudotype preparations.  
361 The modulation of IFITM or LY6E on the transduction of a given pseudotype was determined  
362 with a titrated amount of pseudotypes that yield luciferase signal between 10,000 to 1,000,000  
363 light units per well of 96-well plates (69, 72). For a given pseudotype, the input of pseudoviral  
364 particles is consistent across all the experiments.

365

366 **Establishment of cell lines stably expressing wild-type and mutant IFITM or LY6E**  
367 **proteins or shRNA.** HepG2, C3A or A549 cells in each well of 6-well plates were incubated  
368 with 2 ml of Opti-MEM medium containing pseudotyped retroviruses and centrifuged at 20 °C  
369 for 30 minutes at 4,000×g. Forty-eight hours post transduction, cells were cultured with media  
370 containing 2 µg/ml of puromycin for two weeks. The antibiotic resistant cells were pooled and  
371 expanded into cell lines stably expressing wild-type or mutant IFITM or LY6E proteins or  
372 shRNA targeting LY6E. Flp-In TREx 293-derived cell lines expressing IFITM, GILT, ADAP2  
373 or LY6E proteins in a tetracycline (tet) inducible manner were established as previously  
374 described (64, 66).

375

376 **Immunofluorescence.** To visualize HCoV-OC43 infected cells, the infected cultures were fixed  
377 with 2% paraformaldehyde for 10 min. After permeabilization with 0.1% Triton X-100, the cells  
378 were stained with a monoclonal antibody (541-8F) recognizing HCoV-OC43 NP protein. The  
379 bound antibodies were visualized by using Alexa Fluor 488-labeled (green) goat anti-mouse IgG  
380 or Alexa Fluor 555-labeled (red) goat anti-mouse IgG, Cell nuclei were counterstained with  
381 DAPI.

382

383 **Western blot assay.** Cells were lysed with 1× Laemmli buffer. An aliquot of cell lysate was  
384 separated on NuPAGE® Novex 4-12% Bis-Tris Gel (Invitrogen) and electrophoretically  
385 transferred onto a nitrocellulose membrane (Invitrogen). The membranes were blocked with PBS  
386 containing 5% nonfat dry milk and probed with the desired antibody. The bound antibodies were  
387 visualized with IRDye secondary antibodies and imaging with LI-COR Odyssey system (LI-  
388 COR Biotechnology).

389

390 **Real-time RT-PCR.** HCoV-OC43 RNA was quantified by a qRT-PCR assay described  
391 previously (42). To determine the level of ISG mRNA, total cellular RNA was extracted using  
392 TRIzol reagent (Invitrogen) and the same amount of total cellular RNA was reverse-transcribed  
393 with SuperScript III kit ((Invitrogen). Quantitative RT-PCR was performed using iTaq universal  
394 SYBR Green Supermix (Bio-Rad) with the following primers: LY6E, 5' -  
395 GTACTGCCTGAAGCCGACCATC-3' and 5' -AGATTCCCAATGCCGGCACTAG-3' ;  
396 ADAP2, 5' -AGCTGTCATCAGCATTAAG-3' and 5' -ACTATCTCCTTCCCACCTTTC-3' ;  
397 GILT, 5' -AATGTGACCCTCTACTATGAAG-3' and 5' -

398 ACGCTGGTGCCCTACGGAAACG-3' ; GAPDH, 5' -GAAGGTGAAGGTCGGAGTCAAC-3  
399 ' and 5' -CAGAGTTAAAAGCAGCCCTGGT-3' . Gene expression was calculated using the  $2^{-\Delta}$   
400  $\Delta_{CT}$  method, normalized to GAPDH as described previously (31, 40).

401  
402 **Luciferase assay.** Flp-In TREx 293-derived IFITM-expressing cell lines were seeded into 96-  
403 well plates with black wall and clear bottom and transfected with an empty vector plasmid or  
404 plasmids encoding ACE2, APN, or DPP4 to express viral receptors. For Huh7.5-derived IFITM-  
405 expressing cell lines, cells were seeded into black wall 96-well plates. Cells were infected at 24 h  
406 post transfection or infected with desired pseudotyped lentiviral particles for 2 h, and then  
407 replenished with fresh media. Two days post infection, the media were removed and cells were  
408 lysed with 20  $\mu$ l/well of cell lysis buffer (Promega) for 15 min, followed by adding 50  $\mu$ l/well of  
409 luciferase substrate (Promega). The firefly luciferase activities were measured by luminometry in  
410 a TopCounter (Perkin Elmer) (69).

411  
412 **Statistical analyses** All the experiments were repeated at least three times. Differences between  
413 control sample and tests were statistically analyzed using Student's *t* tests or one-way analysis of  
414 variance (ANOVA). *p*-values less than 0.05 were considered statistically significant.

415

416 **Funding Information**

417 This work was supported by grants from the National Institutes of Health, USA (AI113267) to  
418 J.-T. Guo, National Natural Science Foundation of China (81772173 and 81971916) and  
419 National Science and Technology Mega-Project of China (2018ZX10301-408-002) to X. Zhao  
420 and The Commonwealth of Pennsylvania through the Hepatitis B Foundation.

421

422 **REFERENCES**

423

- 424 1. **Weiss SR, Navas-Martin S.** 2005. Coronavirus pathogenesis and the emerging pathogen  
425 severe acute respiratory syndrome coronavirus. *Microbiol Mol Biol Rev* **69**:635-664.
- 426 2. **Peck KM, Burch CL, Heise MT, Baric RS.** 2015. Coronavirus Host Range Expansion  
427 and Middle East Respiratory Syndrome Coronavirus Emergence: Biochemical  
428 Mechanisms and Evolutionary Perspectives. *Annu Rev Virol* **2**:95-117.
- 429 3. **Ksiazek TG, Erdman D, Goldsmith CS, Zaki SR, Peret T, Emery S, Tong S, Urbani  
430 C, Comer JA, Lim W, Rollin PE, Dowell SF, Ling AE, Humphrey CD, Shieh WJ,  
431 Guarner J, Paddock CD, Rota P, Fields B, DeRisi J, Yang JY, Cox N, Hughes JM,  
432 LeDuc JW, Bellini WJ, Anderson LJ, Group SW.** 2003. A novel coronavirus  
433 associated with severe acute respiratory syndrome. *N Engl J Med* **348**:1953-1966.
- 434 4. **Rota PA, Oberste MS, Monroe SS, Nix WA, Campagnoli R, Icenogle JP, Penaranda  
435 S, Bankamp B, Maher K, Chen MH, Tong S, Tamin A, Lowe L, Frace M, DeRisi JL,  
436 Chen Q, Wang D, Erdman DD, Peret TC, Burns C, Ksiazek TG, Rollin PE, Sanchez  
437 A, Liffick S, Holloway B, Limor J, McCaustland K, Olsen-Rasmussen M, Fouchier  
438 R, Gunther S, Osterhaus AD, Drosten C, Pallansch MA, Anderson LJ, Bellini WJ.**  
439 2003. Characterization of a novel coronavirus associated with severe acute respiratory  
440 syndrome. *Science* **300**:1394-1399.
- 441 5. **Zaki AM, van Boheemen S, Bestebroer TM, Osterhaus AD, Fouchier RA.** 2012.  
442 Isolation of a novel coronavirus from a man with pneumonia in Saudi Arabia. *N Engl J*  
443 *Med* **367**:1814-1820.
- 444 6. **van Boheemen S, de Graaf M, Lauber C, Bestebroer TM, Raj VS, Zaki AM,  
445 Osterhaus AD, Haagmans BL, Gorbalenya AE, Snijder EJ, Fouchier RA.** 2012.  
446 Genomic characterization of a newly discovered coronavirus associated with acute  
447 respiratory distress syndrome in humans. *mBio* **3**.
- 448 7. **Wu F, Zhao S, Yu B, Chen YM, Wang W, Song ZG, Hu Y, Tao ZW, Tian JH, Pei  
449 YY, Yuan ML, Zhang YL, Dai FH, Liu Y, Wang QM, Zheng JJ, Xu L, Holmes EC,  
450 Zhang YZ.** 2020. A new coronavirus associated with human respiratory disease in China.  
451 *Nature* **579**:265-269.
- 452 8. **Zhou P, Yang XL, Wang XG, Hu B, Zhang L, Zhang W, Si HR, Zhu Y, Li B, Huang  
453 CL, Chen HD, Chen J, Luo Y, Guo H, Jiang RD, Liu MQ, Chen Y, Shen XR, Wang  
454 X, Zheng XS, Zhao K, Chen QJ, Deng F, Liu LL, Yan B, Zhan FX, Wang YY, Xiao  
455 GF, Shi ZL.** 2020. A pneumonia outbreak associated with a new coronavirus of probable  
456 bat origin. *Nature* **579**:270-273.
- 457 9. **Zhu N, Zhang D, Wang W, Li X, Yang B, Song J, Zhao X, Huang B, Shi W, Lu R,  
458 Niu P, Zhan F, Ma X, Wang D, Xu W, Wu G, Gao GF, Tan W, China Novel  
459 Coronavirus I, Research T.** 2020. A Novel Coronavirus from Patients with Pneumonia  
460 in China, 2019. *N Engl J Med* **382**:727-733.
- 461 10. **Lu R, Zhao X, Li J, Niu P, Yang B, Wu H, Wang W, Song H, Huang B, Zhu N, Bi Y,  
462 Ma X, Zhan F, Wang L, Hu T, Zhou H, Hu Z, Zhou W, Zhao L, Chen J, Meng Y,  
463 Wang J, Lin Y, Yuan J, Xie Z, Ma J, Liu WJ, Wang D, Xu W, Holmes EC, Gao GF,  
464 Wu G, Chen W, Shi W, Tan W.** 2020. Genomic characterisation and epidemiology of  
465 2019 novel coronavirus: implications for virus origins and receptor binding. *Lancet*  
466 **395**:565-574.

- 467 11. **Menachery VD, Yount BL, Jr., Debbink K, Agnihothram S, Gralinski LE, Plante**  
468 **JA, Graham RL, Scobey T, Ge XY, Donaldson EF, Randell SH, Lanzavecchia A,**  
469 **Marasco WA, Shi ZL, Baric RS.** 2015. A SARS-like cluster of circulating bat  
470 coronaviruses shows potential for human emergence. *Nat Med* **21**:1508-1513.
- 471 12. **Wan Y, Shang J, Graham R, Baric RS, Li F.** 2020. Receptor recognition by novel  
472 coronavirus from Wuhan: An analysis based on decade-long structural studies of SARS. *J*  
473 *Virol* doi:10.1128/JVI.00127-20.
- 474 13. **Sheahan T, Rockx B, Donaldson E, Sims A, Pickles R, Corti D, Baric R.** 2008.  
475 Mechanisms of zoonotic severe acute respiratory syndrome coronavirus host range  
476 expansion in human airway epithelium. *J Virol* **82**:2274-2285.
- 477 14. **Li W, Moore MJ, Vasilieva N, Sui J, Wong SK, Berne MA, Somasundaran M,**  
478 **Sullivan JL, Luzuriaga K, Greenough TC, Choe H, Farzan M.** 2003. Angiotensin-  
479 converting enzyme 2 is a functional receptor for the SARS coronavirus. *Nature* **426**:450-  
480 454.
- 481 15. **Hofmann H, Pyrc K, van der Hoek L, Geier M, Berkhout B, Pohlmann S.** 2005.  
482 Human coronavirus NL63 employs the severe acute respiratory syndrome coronavirus  
483 receptor for cellular entry. *Proc Natl Acad Sci U S A* **102**:7988-7993.
- 484 16. **Hoffmann M, Kleine-Weber H, Schroeder S, Kruger N, Herrler T, Erichsen S,**  
485 **Schiergens TS, Herrler G, Wu NH, Nitsche A, Muller MA, Drosten C, Pohlmann S.**  
486 2020. SARS-CoV-2 Cell Entry Depends on ACE2 and TMPRSS2 and Is Blocked by a  
487 Clinically Proven Protease Inhibitor. *Cell* doi:10.1016/j.cell.2020.02.052.
- 488 17. **Raj VS, Mou H, Smits SL, Dekkers DH, Muller MA, Dijkman R, Muth D, Demmers**  
489 **JA, Zaki A, Fouchier RA, Thiel V, Drosten C, Rottier PJ, Osterhaus AD, Bosch BJ,**  
490 **Haagmans BL.** 2013. Dipeptidyl peptidase 4 is a functional receptor for the emerging  
491 human coronavirus-EMC. *Nature* **495**:251-254.
- 492 18. **Lachance C, Arbour N, Cashman NR, Talbot PJ.** 1998. Involvement of  
493 aminopeptidase N (CD13) in infection of human neural cells by human coronavirus 229E.  
494 *J Virol* **72**:6511-6519.
- 495 19. **Hulswit RJG, Lang Y, Bakkers MJG, Li W, Li Z, Schouten A, Ophorst B, van**  
496 **Kuppeveld FJM, Boons GJ, Bosch BJ, Huizinga EG, de Groot RJ.** 2019. Human  
497 coronaviruses OC43 and HKU1 bind to 9-O-acetylated sialic acids via a conserved  
498 receptor-binding site in spike protein domain A. *Proc Natl Acad Sci U S A* **116**:2681-  
499 2690.
- 500 20. **Gallagher TM, Buchmeier MJ.** 2001. Coronavirus spike proteins in viral entry and  
501 pathogenesis. *Virology* **279**:371-374.
- 502 21. **Millet JK, Whittaker GR.** 2015. Host cell proteases: Critical determinants of  
503 coronavirus tropism and pathogenesis. *Virus research* **202**:120-134.
- 504 22. **Chen Y, Liu L, Wei Q, Zhu H, Jiang H, Tu X, Qin C, Chen Z.** 2008. Rhesus  
505 angiotensin converting enzyme 2 supports entry of severe acute respiratory syndrome  
506 coronavirus in Chinese macaques. *Virology* **381**:89-97.
- 507 23. **Guo H, Guo A, Wang C, Yan B, Lu H, Chen H.** 2008. Expression of feline angiotensin  
508 converting enzyme 2 and its interaction with SARS-CoV S1 protein. *Res Vet Sci* **84**:494-  
509 496.
- 510 24. **Heller LK, Gillim-Ross L, Olivieri ER, Wentworth DE.** 2006. *Mustela vison* ACE2  
511 functions as a receptor for SARS-coronavirus. *Adv Exp Med Biol* **581**:507-510.

- 512 25. **Xu L, Zhang Y, Liu Y, Chen Z, Deng H, Ma Z, Wang H, Hu Z, Deng F.** 2009. The  
513 Angiotensin Converting Enzyme 2 (ACE2) from Raccoon Dog can serve as an efficient  
514 Receptor for the Spike Protein of Severe Acute Respiratory Syndrome Coronavirus. *J*  
515 *Gen Virol* doi:vir.0.013490-0 [pii]  
516 10.1099/vir.0.013490-0.
- 517 26. **Zamoto A, Taguchi F, Fukushi S, Morikawa S, Yamada YK.** 2006. Identification of  
518 ferret ACE2 and its receptor function for SARS-coronavirus. *Adv Exp Med Biol*  
519 **581**:519-522.
- 520 27. **Guan Y, Zheng BJ, He YQ, Liu XL, Zhuang ZX, Cheung CL, Luo SW, Li PH,**  
521 **Zhang LJ, Guan YJ, Butt KM, Wong KL, Chan KW, Lim W, Shortridge KF, Yuen**  
522 **KY, Peiris JS, Poon LL.** 2003. Isolation and characterization of viruses related to the  
523 SARS coronavirus from animals in southern China. *Science* **302**:276-278.
- 524 28. **Martina BE, Haagmans BL, Kuiken T, Fouchier RA, Rimmelzwaan GF, Van**  
525 **Amerongen G, Peiris JS, Lim W, Osterhaus AD.** 2003. Virology: SARS virus  
526 infection of cats and ferrets. *Nature* **425**:915.
- 527 29. **Qin C, Wang J, Wei Q, She M, Marasco WA, Jiang H, Tu X, Zhu H, Ren L, Gao H,**  
528 **Guo L, Huang L, Yang R, Cong Z, Wang Y, Liu Y, Sun Y, Duan S, Qu J, Chen L,**  
529 **Tong W, Ruan L, Liu P, Zhang H, Zhang J, Liu D, Liu Q, Hong T, He W.** 2005. An  
530 animal model of SARS produced by infection of *Macaca mulatta* with SARS coronavirus.  
531 *J Pathol* **206**:251-259.
- 532 30. **Rowe T, Gao G, Hogan RJ, Crystal RG, Voss TG, Grant RL, Bell P, Kobinger GP,**  
533 **Wivel NA, Wilson JM.** 2004. Macaque model for severe acute respiratory syndrome. *J*  
534 *Virol* **78**:11401-11404.
- 535 31. **Shirato K, Kawase M, Matsuyama S.** 2013. Middle East respiratory syndrome  
536 coronavirus infection mediated by the transmembrane serine protease TMPRSS2. *J Virol*  
537 **87**:12552-12561.
- 538 32. **Bertram S, Dijkman R, Habjan M, Heurich A, Gierer S, Glowacka I, Welsch K,**  
539 **Winkler M, Schneider H, Hofmann-Winkler H, Thiel V, Pohlmann S.** 2013.  
540 TMPRSS2 activates the human coronavirus 229E for cathepsin-independent host cell  
541 entry and is expressed in viral target cells in the respiratory epithelium. *J Virol* **87**:6150-  
542 6160.
- 543 33. **Glowacka I, Bertram S, Muller MA, Allen P, Soilleux E, Pfefferle S, Steffen I,**  
544 **Tsegaye TS, He Y, Gnirss K, Niemeyer D, Schneider H, Drosten C, Pohlmann S.**  
545 2011. Evidence that TMPRSS2 activates the severe acute respiratory syndrome  
546 coronavirus spike protein for membrane fusion and reduces viral control by the humoral  
547 immune response. *J Virol* **85**:4122-4134.
- 548 34. **Matsuyama S, Nagata N, Shirato K, Kawase M, Takeda M, Taguchi F.** 2010.  
549 Efficient activation of the severe acute respiratory syndrome coronavirus spike protein by  
550 the transmembrane protease TMPRSS2. *J Virol* **84**:12658-12664.
- 551 35. **Letko M, Marzi A, Munster V.** 2020. Functional assessment of cell entry and receptor  
552 usage for SARS-CoV-2 and other lineage B betacoronaviruses. *Nat Microbiol*  
553 doi:10.1038/s41564-020-0688-y.
- 554 36. **Schneider WM, Chevillotte MD, Rice CM.** 2014. Interferon-stimulated genes: a  
555 complex web of host defenses. *Annu Rev Immunol* **32**:513-545.
- 556 37. **Zhao X, Li J, Winkler CA, An P, Guo JT.** 2018. IFITM Genes, Variants, and Their  
557 Roles in the Control and Pathogenesis of Viral Infections. *Front Microbiol* **9**:3228.

- 558 38. **Chen D, Hou Z, Jiang D, Zheng M, Li G, Zhang Y, Li R, Lin H, Chang J, Zeng H,**  
559 **Guo JT, Zhao X.** 2019. GILT restricts the cellular entry mediated by the envelope  
560 glycoproteins of SARS-CoV, Ebola virus and Lassa fever virus. *Emerg Microbes Infect*  
561 **8**:1511-1523.
- 562 39. **Liu SY, Aliyari R, Chikere K, Li G, Marsden MD, Smith JK, Pernet O, Guo H,**  
563 **Nusbaum R, Zack JA, Freiberg AN, Su L, Lee B, Cheng G.** 2013. Interferon-inducible  
564 cholesterol-25-hydroxylase broadly inhibits viral entry by production of 25-  
565 hydroxycholesterol. *Immunity* **38**:92-105.
- 566 40. **Shu Q, Lennemann NJ, Sarkar SN, Sadovsky Y, Coyne CB.** 2015. ADAP2 Is an  
567 Interferon Stimulated Gene That Restricts RNA Virus Entry. *PLoS Pathog* **11**:e1005150.
- 568 41. **Yu J, Liu SL.** 2019. Emerging Role of LY6E in Virus-Host Interactions. *Viruses* **11**.
- 569 42. **Zhao X, Guo F, Liu F, Cuconati A, Chang J, Block TM, Guo JT.** 2014. Interferon  
570 induction of IFITM proteins promotes infection by human coronavirus OC43. *Proc Natl*  
571 *Acad Sci U S A* **111**:6756-6761.
- 572 43. **Zhao X, Sehgal M, Hou Z, Cheng J, Shu S, Wu S, Guo F, Le Marchand SJ, Lin H,**  
573 **Chang J, Guo JT.** 2018. Identification of Residues Controlling Restriction versus  
574 Enhancing Activities of IFITM Proteins on Entry of Human Coronaviruses. *J Virol* **92**.
- 575 44. **Sussman NL, Chong MG, Koussayer T, He DE, Shang TA, Whisennand HH, Kelly**  
576 **JH.** 1992. Reversal of fulminant hepatic failure using an extracorporeal liver assist device.  
577 *Hepatology* **16**:60-65.
- 578 45. **van Wenum M, Adam AA, Hakvoort TB, Hendriks EJ, Shevchenko V, van Gulik**  
579 **TM, Chamuleau RA, Hoekstra R.** 2016. Selecting Cells for Bioartificial Liver Devices  
580 and the Importance of a 3D Culture Environment: A Functional Comparison between the  
581 HepaRG and C3A Cell Lines. *Int J Biol Sci* **12**:964-978.
- 582 46. **Yu J, Liang C, Liu SL.** 2019. CD4-Dependent Modulation of HIV-1 Entry by LY6E. *J*  
583 *Virol* **93**.
- 584 47. **Yu J, Liang C, Liu SL.** 2017. Interferon-inducible LY6E Protein Promotes HIV-1  
585 Infection. *J Biol Chem* **292**:4674-4685.
- 586 48. **Mar KB, Rinkenberger NR, Boys IN, Eitson JL, McDougal MB, Richardson RB,**  
587 **Schoggins JW.** 2018. LY6E mediates an evolutionarily conserved enhancement of virus  
588 infection by targeting a late entry step. *Nat Commun* **9**:3603.
- 589 49. **Waheed AA, Ablan SD, Soheilian F, Nagashima K, Ono A, Schaffner CP, Freed EO.**  
590 2008. Inhibition of human immunodeficiency virus type 1 assembly and release by the  
591 cholesterol-binding compound amphotericin B methyl ester: evidence for Vpu  
592 dependence. *J Virol* **82**:9776-9781.
- 593 50. **Brown DA, London E.** 2000. Structure and function of sphingolipid- and cholesterol-  
594 rich membrane rafts. *J Biol Chem* **275**:17221-17224.
- 595 51. **Chazal N, Gerlier D.** 2003. Virus entry, assembly, budding, and membrane rafts.  
596 *Microbiol Mol Biol Rev* **67**:226-237, table of contents.
- 597 52. **Lin TY, Chin CR, Everitt AR, Clare S, Perreira JM, Savidis G, Aker AM, John SP,**  
598 **Sarlah D, Carreira EM, Elledge SJ, Kellam P, Brass AL.** 2013. Amphotericin B  
599 increases influenza A virus infection by preventing IFITM3-mediated restriction. *Cell*  
600 *Rep* **5**:895-908.
- 601 53. **Godfrey DI, Masicantonio M, Tucek CL, Malin MA, Boyd RL, Hugo P.** 1992.  
602 Thymic shared antigen-1. A novel thymocyte marker discriminating immature from  
603 mature thymocyte subsets. *J Immunol* **148**:2006-2011.



- 604 54. **Saitoh S, Kosugi A, Noda S, Yamamoto N, Ogata M, Minami Y, Miyake K,**  
605 **Hamaoka T.** 1995. Modulation of TCR-mediated signaling pathway by thymic shared  
606 antigen-1 (TSA-1)/stem cell antigen-2 (Sca-2). *J Immunol* **155**:5574-5581.
- 607 55. **Bacquin A, Bireau C, Tanguy M, Romanet C, Vernochet C, Dupressoir A,**  
608 **Heidmann T.** 2017. A Cell Fusion-Based Screening Method Identifies  
609 Glycosylphosphatidylinositol-Anchored Protein Ly6e as the Receptor for Mouse  
610 Endogenous Retroviral Envelope Syncytin-A. *J Virol* **91**.
- 611 56. **Langford MB, Outhwaite JE, Hughes M, Natale DRC, Simmons DG.** 2018. Deletion  
612 of the Syncytin A receptor Ly6e impairs syncytiotrophoblast fusion and placental  
613 morphogenesis causing embryonic lethality in mice. *Sci Rep* **8**:3961.
- 614 57. **Buchrieser J, Degrelle SA, Couderc T, Nevers Q, Disson O, Manet C, Donahue DA,**  
615 **Porrot F, Hillion KH, Perthame E, Arroyo MV, Souquere S, Ruigrok K, Dupressoir**  
616 **A, Heidmann T, Montagutelli X, Fournier T, Lecuit M, Schwartz O.** 2019. IFITM  
617 proteins inhibit placental syncytiotrophoblast formation and promote fetal demise.  
618 *Science* **365**:176-180.
- 619 58. **Zani A, Zhang L, McMichael TM, Kenney AD, Chemudupati M, Kwiek JJ, Liu SL,**  
620 **Yount JS.** 2019. Interferon-induced transmembrane proteins inhibit cell fusion mediated  
621 by trophoblast syncytins. *J Biol Chem* **294**:19844-19851.
- 622 59. **Rabbani MA, Ribaldo M, Guo JT, Barik S.** 2016. Identification of Interferon-  
623 Stimulated Gene Proteins That Inhibit Human Parainfluenza Virus Type 3. *J Virol*  
624 **90**:11145-11156.
- 625 60. **Wilkins C, Woodward J, Lau DT, Barnes A, Joyce M, McFarlane N, McKeating JA,**  
626 **Tyrrell DL, Gale M, Jr.** 2013. IFITM1 is a tight junction protein that inhibits hepatitis C  
627 virus entry. *Hepatology* **57**:461-469.
- 628 61. **Huang IC, Bailey CC, Weyer JL, Radoshitzky SR, Becker MM, Chiang JJ, Brass**  
629 **AL, Ahmed AA, Chi X, Dong L, Longobardi LE, Boltz D, Kuhn JH, Elledge SJ,**  
630 **Bavari S, Denison MR, Choe H, Farzan M.** 2011. Distinct patterns of IFITM-mediated  
631 restriction of filoviruses, SARS coronavirus, and influenza A virus. *PLoS Pathog*  
632 **7**:e1001258.
- 633 62. **Feeley EM, Sims JS, John SP, Chin CR, Pertel T, Chen LM, Gaiha GD, Ryan BJ,**  
634 **Donis RO, Elledge SJ, Brass AL.** 2011. IFITM3 inhibits influenza A virus infection by  
635 preventing cytosolic entry. *PLoS Pathog* **7**:e1002337.
- 636 63. **Yu J, Murthy V, Liu SL.** 2019. Relating GPI-Anchored Ly6 Proteins uPAR and CD59  
637 to Viral Infection. *Viruses* **11**.
- 638 64. **Jiang D, Guo H, Xu C, Chang J, Gu B, Wang L, Block TM, Guo JT.** 2008.  
639 Identification of three interferon-inducible cellular enzymes that inhibit the replication of  
640 hepatitis C virus. *J Virol* **82**:1665-1678.
- 641 65. **Weidner JM, Jiang D, Pan XB, Chang J, Block TM, Guo JT.** 2010. Interferon-  
642 induced cell membrane proteins, IFITM3 and tetherin, inhibit vesicular stomatitis virus  
643 infection via distinct mechanisms. *J Virol* **84**:12646-12657.
- 644 66. **Jiang D, Weidner JM, Qing M, Pan XB, Guo H, Xu C, Zhang X, Birk A, Chang J,**  
645 **Shi PY, Block TM, Guo JT.** 2010. Identification of five interferon-induced cellular  
646 proteins that inhibit west nile virus and dengue virus infections. *J Virol* **84**:8332-8341.
- 647 67. **Chang J, Warren TK, Zhao X, Gill T, Guo F, Wang L, Comunale MA, Du Y, Alonzi**  
648 **DS, Yu W, Ye H, Liu F, Guo JT, Mehta A, Cuconati A, Butters TD, Bavari S, Xu X,**

- 649            **Block TM.** 2013. Small molecule inhibitors of ER alpha-glucosidases are active against  
650            multiple hemorrhagic fever viruses. *Antiviral Res* doi:10.1016/j.antiviral.2013.03.023.
- 651    68.    **Lin HX, Feng Y, Tu X, Zhao X, Hsieh CH, Griffin L, Junop M, Zhang C.** 2011.  
652            Characterization of the spike protein of human coronavirus NL63 in receptor binding and  
653            pseudotype virus entry. *Virus Res* **160**:283-293.
- 654    69.    **Zhao X, Guo F, Comunale MA, Mehta A, Sehgal M, Jain P, Cuconati A, Lin H,**  
655            **Block TM, Chang J, Guo JT.** 2015. Inhibition of endoplasmic reticulum-resident  
656            glucosidases impairs severe acute respiratory syndrome coronavirus and human  
657            coronavirus NL63 spike protein-mediated entry by altering the glycan processing of  
658            angiotensin I-converting enzyme 2. *Antimicrob Agents Chemother* **59**:206-216.
- 659    70.    **He J, Choe S, Walker R, Di Marzio P, Morgan DO, Landau NR.** 1995. Human  
660            immunodeficiency virus type 1 viral protein R (Vpr) arrests cells in the G2 phase of the  
661            cell cycle by inhibiting p34cdc2 activity. *J Virol* **69**:6705-6711.
- 662    71.    **Connor RI, Chen BK, Choe S, Landau NR.** 1995. Vpr is required for efficient  
663            replication of human immunodeficiency virus type-1 in mononuclear phagocytes.  
664            *Virology* **206**:935-944.
- 665    72.    **Guo F, Zhao X, Gill T, Zhou Y, Campagna M, Wang L, Liu F, Zhang P, DiPaolo L,**  
666            **Du Y, Xu X, Jiang D, Wei L, Cuconati A, Block TM, Guo JT, Chang J.** 2014. An  
667            interferon-beta promoter reporter assay for high throughput identification of compounds  
668            against multiple RNA viruses. *Antiviral Res* **107**:56-65.
- 669

670 **Figure and Figure legend**

671

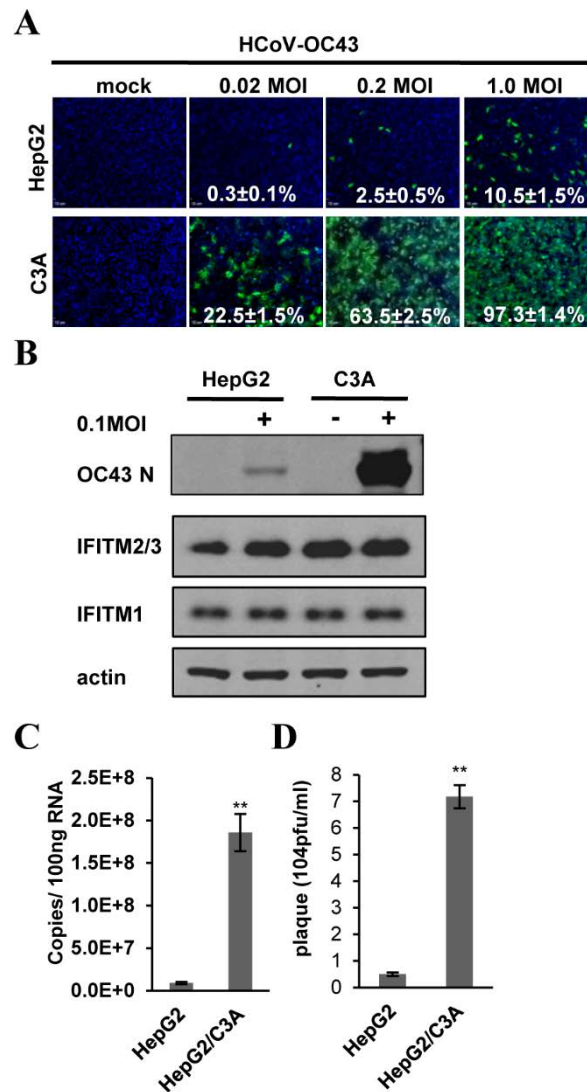

672

673 **Fig. 1. C3A cells are more susceptible to HCoV-OC43 infection than HepG2 cells.** HepG2  
674 and C3A cells were mock-infected or infected with HCoV-OC43 at the indicated M.O.I. (A)  
675 Cells were fixed at 24 h post infection (hpi) and infected cells were visualized by indirect  
676 immunofluorescence (IF) staining of HCoV-OC43 N protein (green). Cell nuclei were visualized  
677 by DAPI staining. (B) HCoV-OC43 NP, IFITMs and  $\beta$ -actin were determined by Western blot  
678 assays. (C) Intracellular viral RNA was quantified by qRT-PCR assay and presented as copies  
679 per 100 ng total RNA. Error bars indicate standard deviations (n = 4). (D) Viral yields were  
680 determined with a plaque assay. Error bars indicate standard deviations (n = 4). \*\* indicates  $p$   
681 <0.001 (student  $t$  test).

682

683

684

685

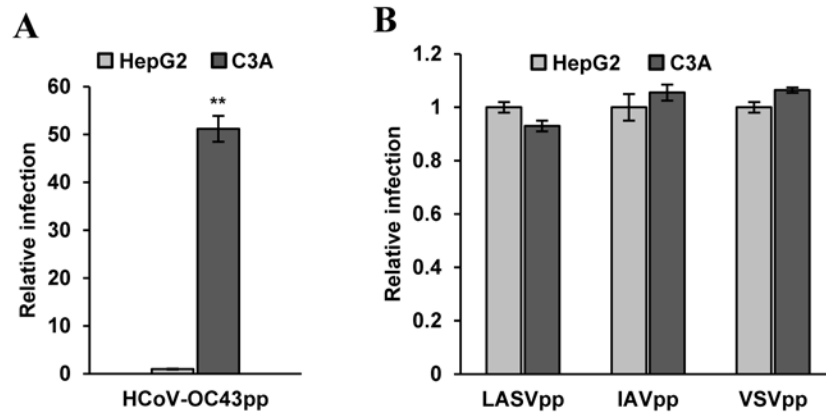

686

687

688

689

690 **Fig. 2. C3A cells support more efficient entry of lentiviral particles pseudotyped with**  
691 **HCoV-OC43 envelope proteins than HepG2 cells.** HepG2 and C3A cells were infected with  
692 HCoV-OC43pp (A), IAVpp, VSVpp or LASVpp (B). Luciferase activities were determined at  
693 72 hpi. Relative infection represents the luciferase activity from C3A normalized to that of  
694 HepG2 cells. Error bars indicate standard deviations (n = 6). \*\* indicates  $p < 0.001$  (student  $t$  test).

695

696

697

698

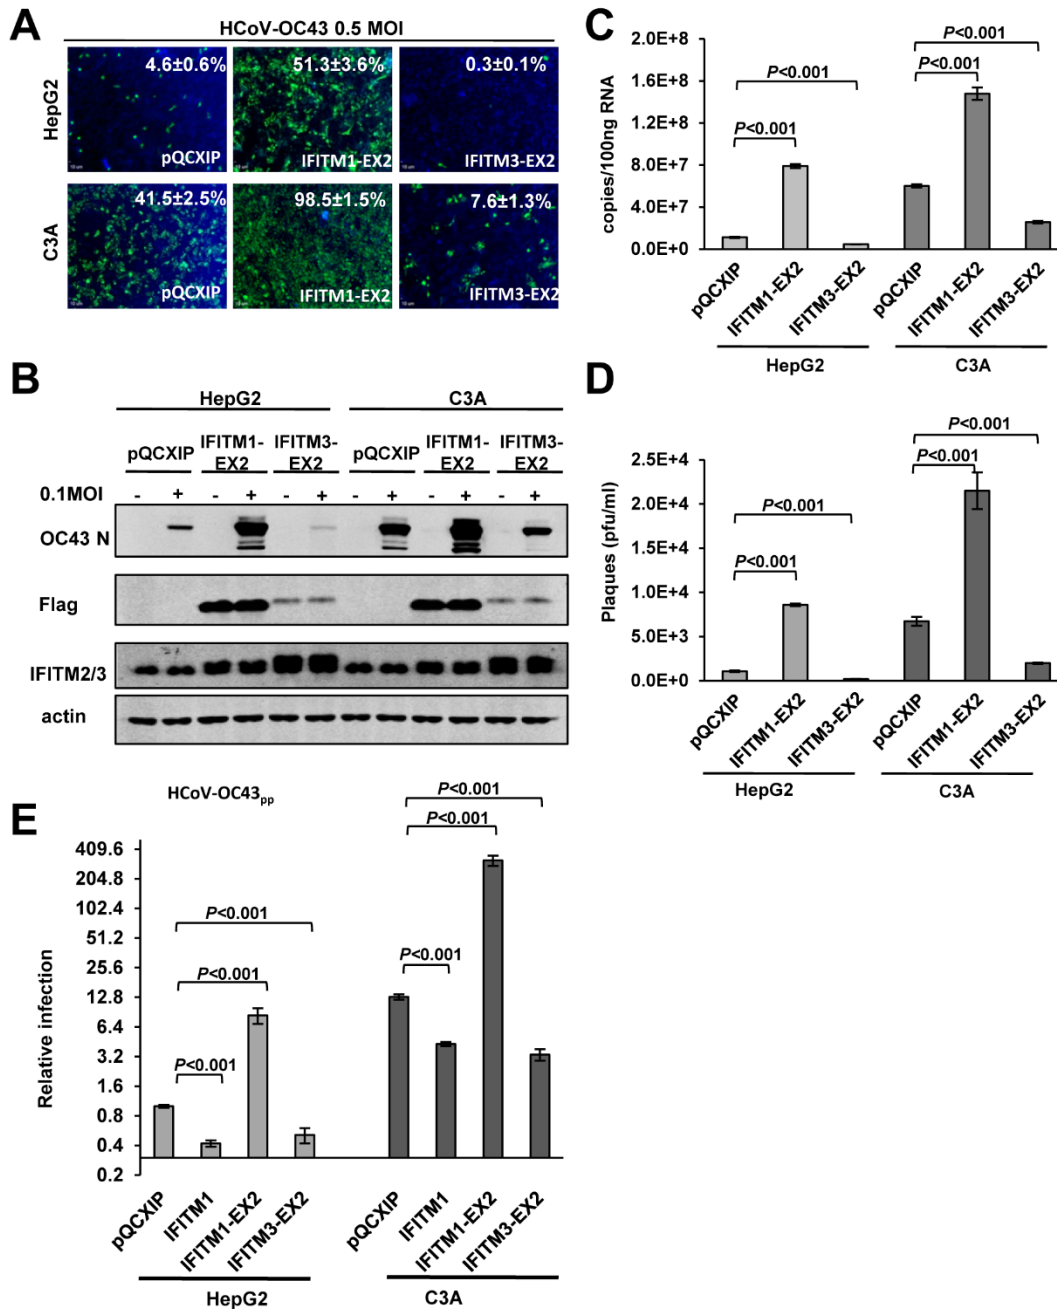

699

700 **Fig. 3. IFITMs modulate HCoV-OC43 infection of HepG2 and C3A cells in a similar**  
 701 **extent and via the same mechanism.** HepG2 and C3A were stably transduced with a control  
 702 retroviral vector (pQCXIP) or a retroviral vector expressing a N-terminally flag tagged IFITM1-  
 703 EX2 or IFITM3-EX2. The resulting cell lines were infected with HCoV-OC43 at 0.1 MOI. (A)  
 704 Cells were fixed at 24 hpi and virally infected cells were visualized by IF staining of HCoV-

705 OC43 N protein (green). Cell nuclei were visualized by DAPI staining. **(B)** HCoV-OC43 NP and  
706 IFITM were determined by Western blot assays.  $\beta$ -actin served as a loading control. **(C)**  
707 Intracellular viral RNA was quantified by a qRT-PCR assay and presented as copies per 100 ng  
708 total RNA. Error bars indicate standard deviations ( $n = 4$ ). **(D)** Viral yields were determined with  
709 a plaque assay. Error bars indicate standard deviations ( $n = 4$ ). **(E)** HepG2 and C3A stably  
710 transduced with a control retroviral vector (pQCXIP) or a retroviral vector expressing IFITM1,  
711 IFITM1-EX2 or IFITM3-EX2 were infected with HCoV-OC43pp. Luciferase activities were  
712 determined at 72 hpi. Relative infection represents the luciferase activity normalized to that of  
713 HepG2 cells transduced with empty vector (pQCXIP). Error bars indicate standard deviations ( $n$   
714 = 6).

715

716

717

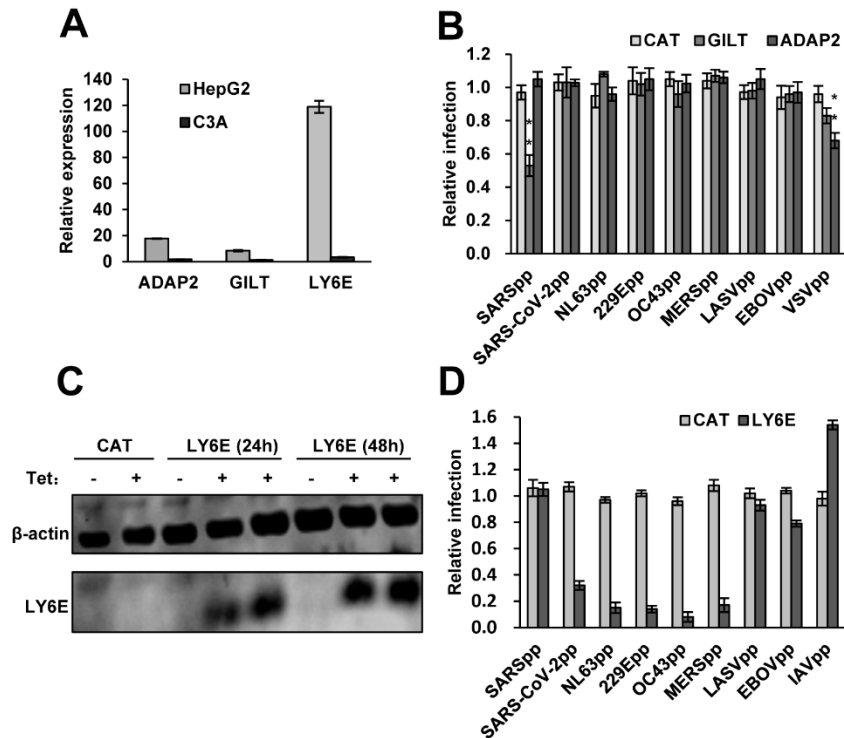

718

719 **Fig. 4. LY6E efficiently suppresses human coronavirus spike protein-mediated entry.** (A)  
 720 Levels of Ly6E, GILT and ADAP2 mRNA expression in HepG2 and C3A cells were determined  
 721 by qRT-PCR assays and normalized to the level of GAPDH. (B) Flp-In T-Rex 293-derived cell  
 722 lines expressing control protein CAT, GILT or ADAP2 were cultured in the absence or presence  
 723 of tet for 24 h. The cells were infected with HCoV-OC43pp and other indicated pseudoviral  
 724 particles and intracellular luciferase activity were determined at 48 hpi. Relative infection is the  
 725 ratio of luciferase activity in the same cells cultured in the presence of tet over that in the absence  
 726 of tet. The error bars refer to standard deviations (n=4). (C) Flp-In T-Rex 293-derived cell line  
 727 expressing a control protein CAT or LY6E were cultured in the absence or presence of tet. Cells  
 728 were harvested at the indicated time after the addition of tet. Intracellular expression of LY6E  
 729 was detected by a Western blot assay.  $\beta$ -actin served as a loading control. (D) Flp-In T-Rex 293-  
 730 derived cell lines expressing LY6E were cultured in the absence or presence of tet for 24 h. The  
 731 cells were then infected with lentiviral particles pseudotyped with the envelope protein of the  
 732 indicated viruses. Luciferase activities were determined at 48 hpi. Relative infection is the ratio  
 733 of luciferase activity in the same cells cultured in the presence of tet over that in the absence of  
 734 tet. The error bars refer to standard deviations (n=4). \*\*,  $p < 0.001$  compared to the control cells  
 735 expressing CAT.

736

737

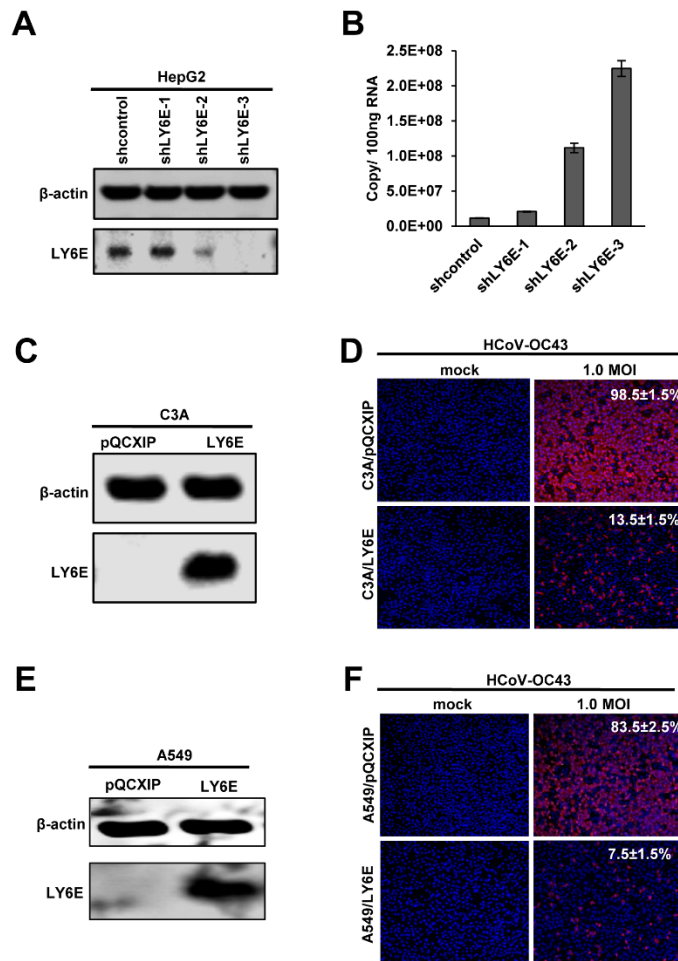

738

739 **Fig. 5 LY6E inhibits HCoV-OC43 infection in human hepatoma (HepG2 and C3A) and**  
740 **lung cancer (A549) cells.** (A) HepG2 cells were stably transduced with scramble shRNA or  
741 shRNA targeting LY6E mRNA. The level of intracellular LY6E expression was determined by  
742 Western blot using a rabbit polyclonal antibody against LY6E. β-actin served as a loading  
743 control. (B) HepG2 cells stably expressing the scramble shRNA or LY6E specific shRNA were  
744 infected with HCoV-OC43 at an MOI of 1.0. Cells were harvested at 24 hpi and intracellular  
745 viral RNA was quantified by qRT-PCR assay and presented as copies per 100 ng total RNA.  
746 Error bars indicate standard deviations (n = 4). (C to F) C3A or A549 cells were stably  
747 transduced with an empty retroviral vector (pQCXIP) or retroviral vector expressing LY6E and  
748 infected with HCoV-OC43 at the indicated MOI. The expression of LY6E in the cell lines was  
749 confirmed by a western blot assay. β-actin served as a loading control (C and E). The cells were  
750 fixed at 24 hpi. The infected cells were visualized by IF staining of HCoV-OC43 N protein (red).  
751 Cell nuclei were visualized by DAPI staining (D and F).



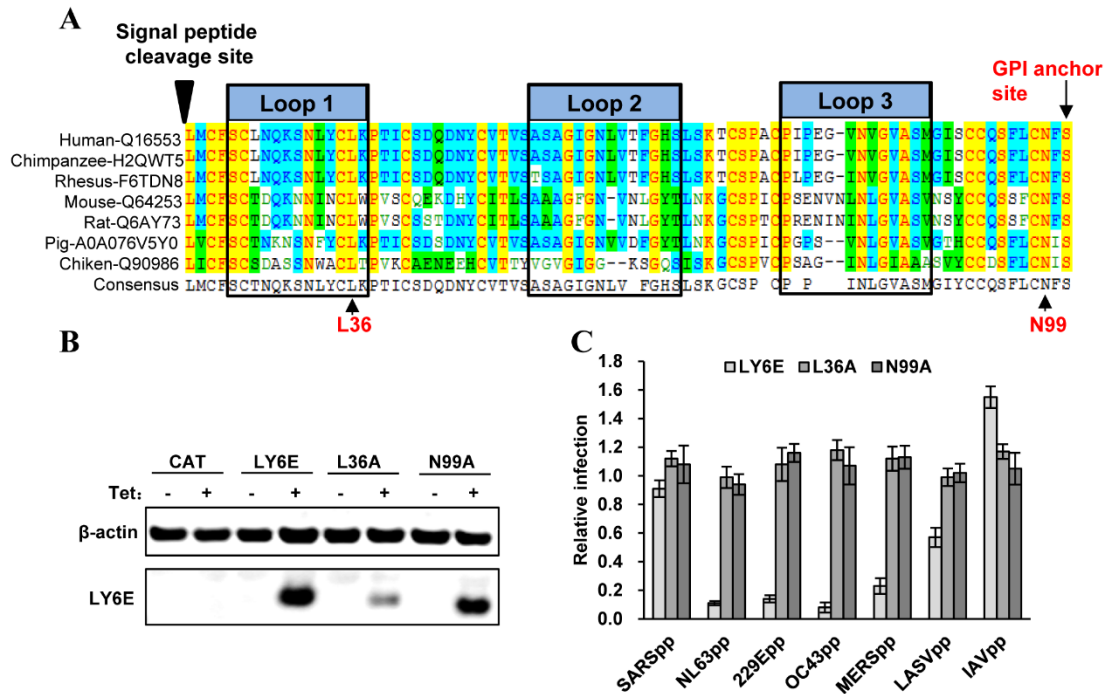

752

753

754 **Fig. 6. Identification of critical structure motifs essential for LY6E to restrict human**  
 755 **coronavirus entry.** (A) The amino acid sequence alignment of LY6E from multiple vertebrate  
 756 species is conducted and “three finger-fold” structure is highlighted with black box. The  
 757 conserved L36 as well as GPI anchor and N99 glycosylation sites are indicated (B) Flp-In T-Rex  
 758 293-derived cell lines expressing a control protein CAT, wild-type or mutant LY6E were  
 759 cultured in the absence or presence of tet for 24 h. Intracellular LY6E expression were detected  
 760 by a Western blot assay.  $\beta$ -actin served as a loading control. (C) Flp-In T-Rex 293-derived cell  
 761 lines expressing the wild-type or mutant LY6E were cultured in the absence or presence of tet for  
 762 24 h. The cells were then infected with the indicated pseudotyped lentivirus. Luciferase activities  
 763 were measured at 48hpi. Relative infection is the ratio of luciferase activity in the same cells  
 764 cultured in the presence of tet over that in the absence of tet. The error bars refer to standard  
 765 deviations (n=4).

766

767

768

769

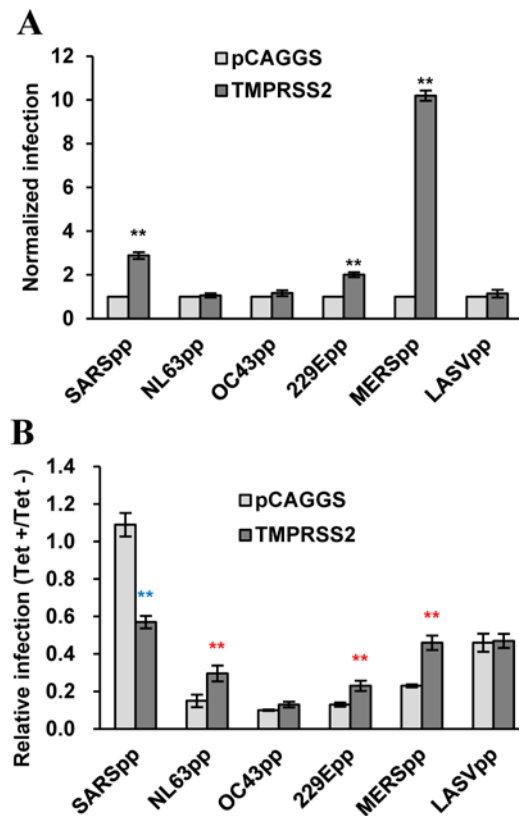

770

771 **Fig. 7. LY6E inhibits TMPRSS2 enhanced entry of human coronaviruses.** Flp-In T-Rex 293-  
772 derived cell line expressing LY6E were transfected with a control vector (pCAGGS) or a  
773 plasmid expressing human TMPRSS2 and cultured in the absence or presence of tet for 24 h.  
774 The cells were then infected with the indicated pseudotyped lentivirus. Luciferase activities were  
775 measured at 48hpi. **(A)** The effect of TMPRSS2 expression on pseudotyped virus infection is  
776 normalized to infection efficiency of the cells transfected with control vector plasmid (set as 1).  
777 Error bars indicate the standard deviation (n=4). **(B)** Relative infection refers to the ratio of the  
778 luciferase activity in the cells cultured in the presence of tet over that in the cells cultured in the  
779 absence of tet. Error bars indicate the standard deviation (n=4). \*\*,  $p < 0.001$ , comparing to cells  
780 transfected with pCAGGS vector.

781

782

783

784

785

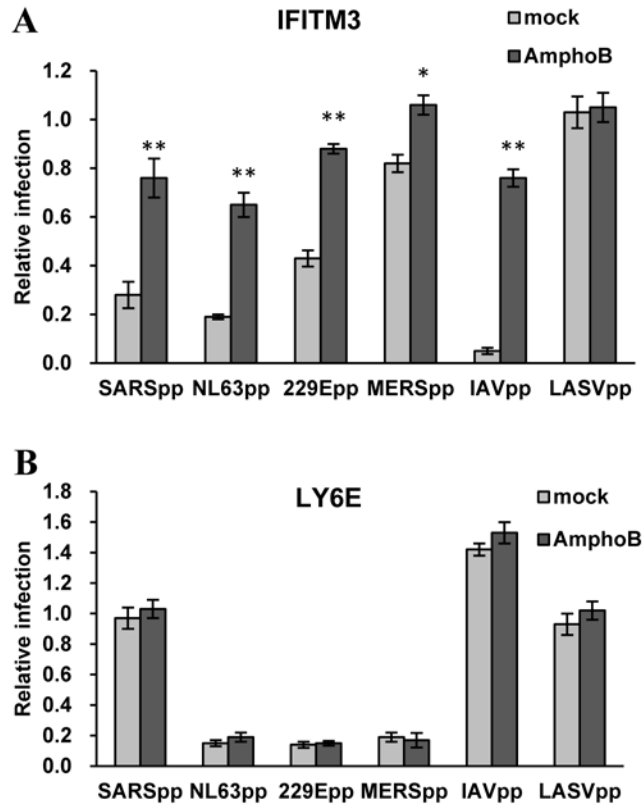

786

787 **Fig. 8. Amphotericin B treatment compromises IFITM3 inhibition of human coronavirus**  
788 **entry, but have no impact on Ly6E inhibition of human coronavirus entry.** Flp-In T-Rex  
789 293-derived cell line expressing IFITM3 (A) or LY6E (B) were cultured in the absence or  
790 presence of tet for 24 h. The cells were then infected with the indicated pseudotyped lentivirus in  
791 the presence or absence of 1 $\mu$ M AmphoB. Luciferase activity was measured at 48 hr post-  
792 infection. Relative infection is the ratio of luciferase activity in the same cells cultured in the  
793 presence of tet over that in the absence of tet. The error bars refer to standard deviations (n=4).  
794 \*\*,  $p < 0.001$ , compared to mock treatment.
